# Supplementary material
Source: PubMed Central journal article supplement (PMC7753731)
Supplement: JGS-69-37-s001.pdf [file JGS-69-37-s001.pdf]

**Table S1.** Early warning scores for COVID-19 risk stratification.

| Score             | When to use                                                                                                                                                                                                                    | Parameters                                                                                                                                                                                                                                                                                                                                                                              |
|-------------------|--------------------------------------------------------------------------------------------------------------------------------------------------------------------------------------------------------------------------------|-----------------------------------------------------------------------------------------------------------------------------------------------------------------------------------------------------------------------------------------------------------------------------------------------------------------------------------------------------------------------------------------|
| <b>ISARIC-4C</b>  | To assess the risk of in-hospital mortality                                                                                                                                                                                    | <ol style="list-style-type: none"> <li>1. Age</li> <li>2. Sex</li> <li>3. Number of comorbidities</li> <li>4. Respiratory rate (breath/min)</li> <li>5. Peripheral oxygen saturation on room air (%)</li> <li>6. Level of consciousness assessed by the response on Glasgow Coma Scale (GCS)</li> <li>7. Blood urea nitrogen (mg/dL)</li> <li>8. C-reactive protein (mg/dL).</li> </ol> |
| <b>NEWS</b>       | To assess the risk of clinical deterioration and potential need for higher level of care in acutely ill patients                                                                                                               | <ol style="list-style-type: none"> <li>1. Respiratory rate (breath/min)</li> <li>2. Peripheral oxygen saturation in room air (%)</li> <li>3. Body temperature (°C)</li> <li>4. Systolic blood pressure (mmHg)</li> <li>5. Heart rate (beat/min)</li> <li>6. Level of consciousness assessed by the response on AVPU (Alert, Voice, Pain, Unresponsive) scale</li> </ol>                 |
| <b>COVID-GRAM</b> | To assess the risk of critical illness, defined as the risk of admission to the intensive care unit, invasive ventilation, or death in hospitalized patients                                                                   | <ol style="list-style-type: none"> <li>1. X-ray abnormality</li> <li>2. Age</li> <li>3. Hemoptysis</li> <li>4. Dyspnea</li> <li>5. Unconsciousness</li> <li>6. Number of comorbidities</li> <li>7. Cancer history</li> <li>8. Neutrophil-lymphocyte ratio</li> <li>9. Lactate dehydrogenase (U/L)</li> <li>10. Direct bilirubin (mg/dL)</li> </ol>                                      |
| <b>qCSI</b>       | To assess the risk of early deterioration (within 24 hours) of patients admitted to the hospital defined as oxygen requirement > 10 L/min by low flow device, high-flow device, non-invasive or invasive ventilation, or death | <ol style="list-style-type: none"> <li>1. Respiratory rate (breath/min)</li> <li>2. Peripheral oxygen saturation in room air (%)</li> <li>3. O<sub>2</sub> flow-rate supplementation (L/min)</li> </ol>                                                                                                                                                                                 |

*Abbreviations: ISARIC-4C, International Severe Acute Respiratory Infection Consortium Clinical Characterisation Protocol-Coronavirus Clinical Characterisation Consortium; NEWS, National early warning score; qCSI, quick COVID severity index.*

**Figure S1.** Flow-chart of the cohort selection for the study.

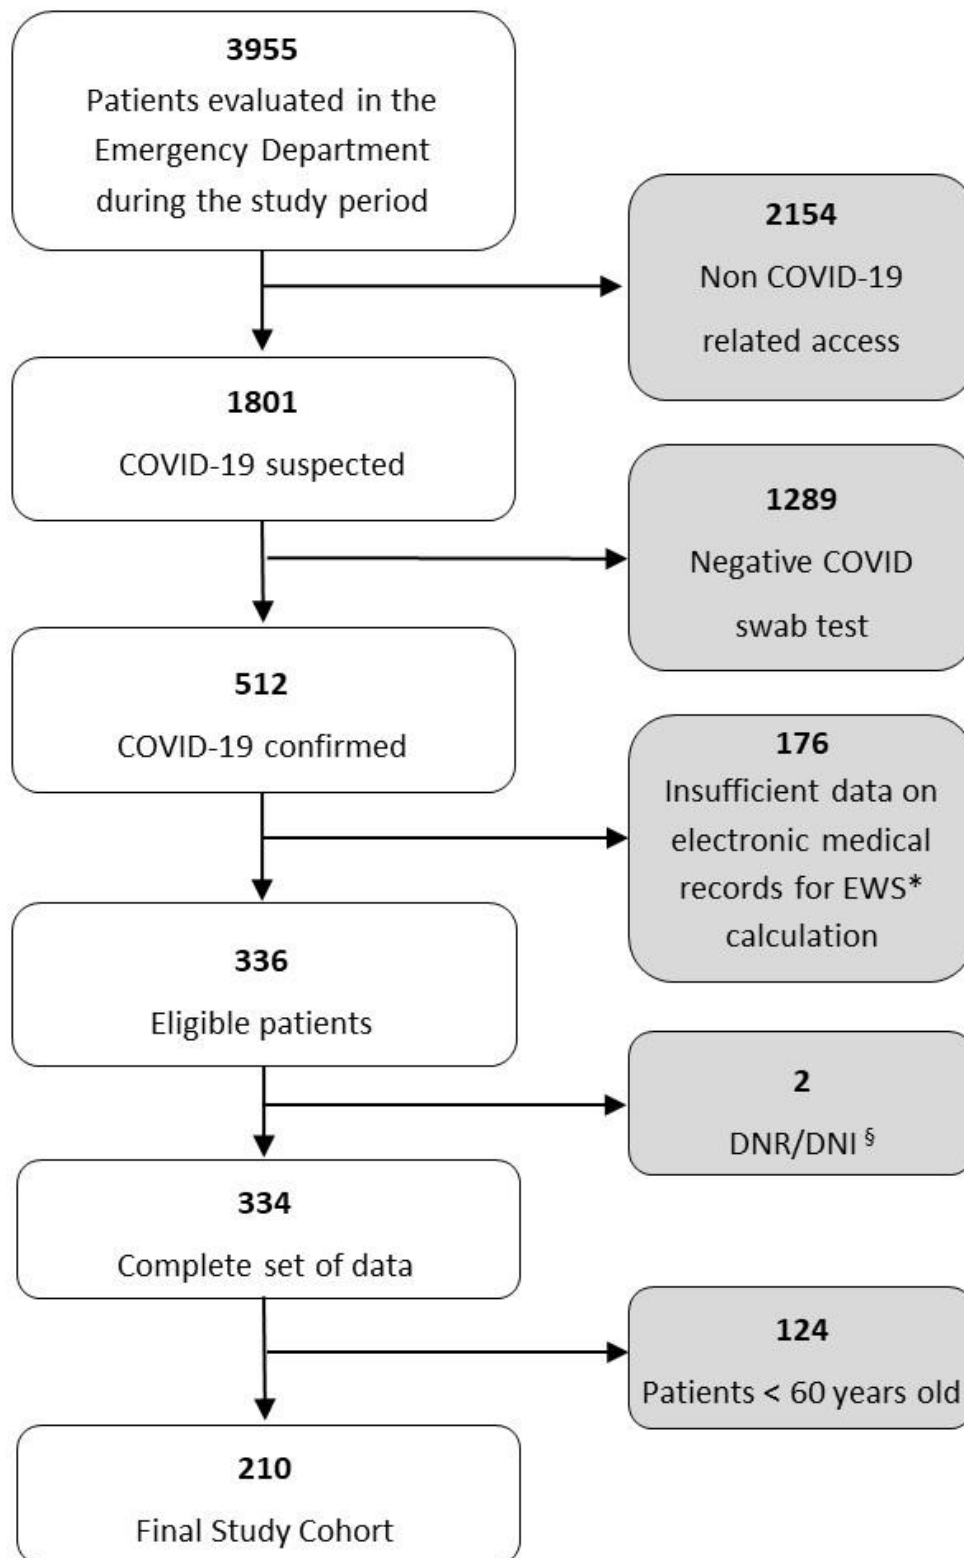

\* EWS: Early Warning Score; <sup>§</sup>DNR/DNI: Do Not Rianimate / Do Not Intubate disposition
